# Supplementary material for: The Emissions Model Intercomparison Project (Emissions-MIP): quantifying model sensitivity to emission characteristics
Source: Copernicus journal article supplement (doi:10.5194/acp-23-14779-2023), 2023-12-01
Supplement: Supplementary file 1 [file acp-23-14779-2023-supplement.zip]

Archive with 3 entries (3 files):
- Emissions-MIP Experimental Protocol - v1b.xlsx
- acp-23-14779-2023-supplement-title-page.pdf
- Emissions-MIP_Phase1a_Supplement.pdf
