# Supplementary material for: The Emissions Model Intercomparison Project (Emissions-MIP): quantifying model sensitivity to emission characteristics
Source: Copernicus journal article supplement (doi:10.5194/acp-23-14779-2023), 2023-12-01
Supplement: Supplementary file 1 [file acp-23-14779-2023-supplement.zip › acp-23-14779-2023-supplement-title-page.pdf]

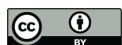

*Supplement of*

## **The Emissions Model Intercomparison Project (Emissions-MIP): quantifying model sensitivity to emission characteristics**

**Hamza Ahsan et al.**

*Correspondence to:* Hamza Ahsan ([hamza.ahsan@pnnl.gov](mailto:hamza.ahsan@pnnl.gov))

- [acp-23-14779-2023-supplement-title-page.pdf](#)
- [Emissions-MIP Experimental Protocol - v1b.xlsx](#)
- [Emissions-MIP\\_Phase1a\\_Supplement.pdf](#)

The copyright of individual parts of the supplement might differ from the article licence.
